# Supplementary material
Source: PubMed Central journal article supplement (PMC4142434)

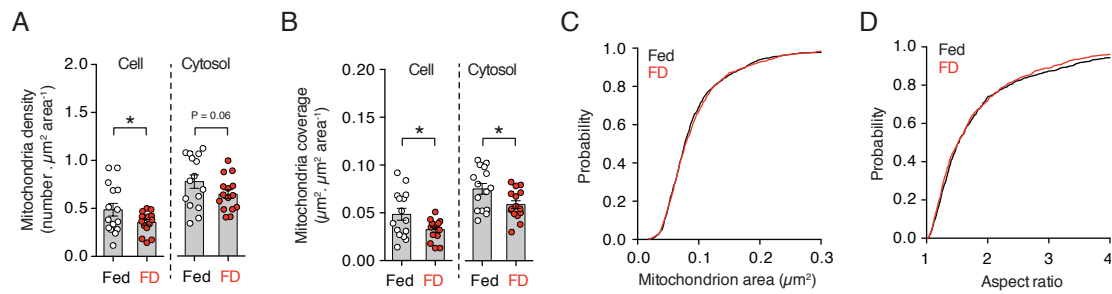

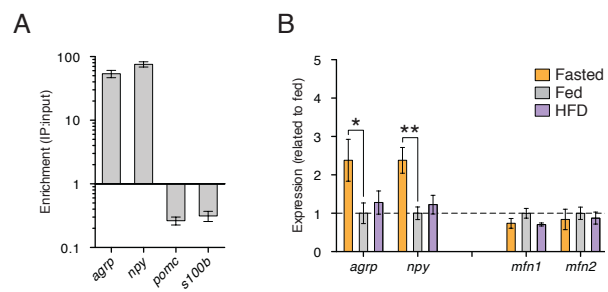

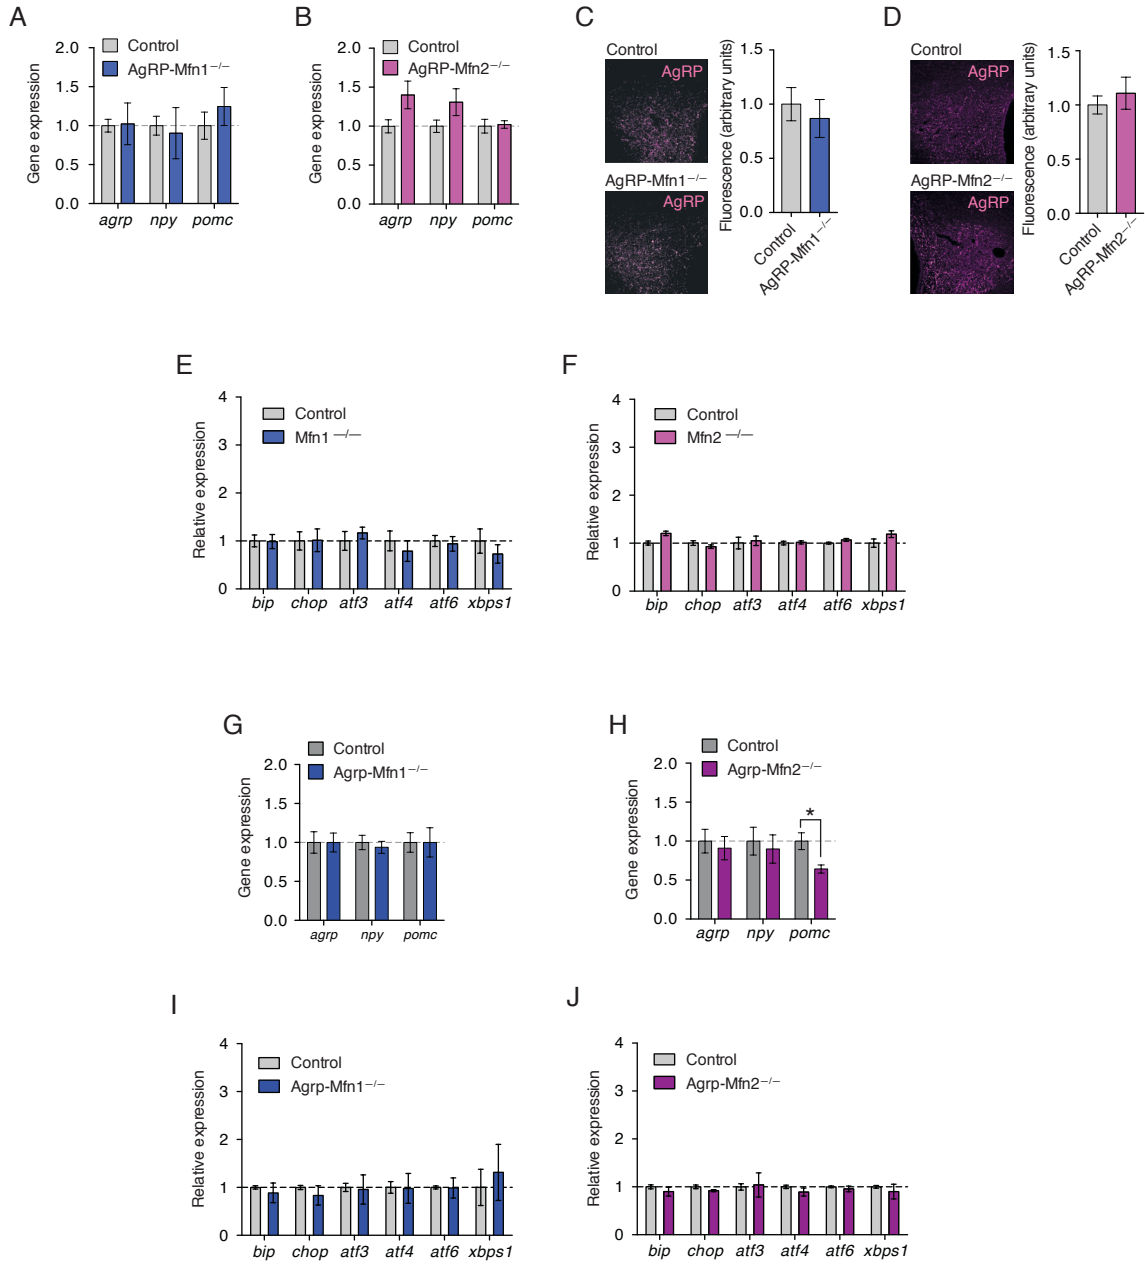

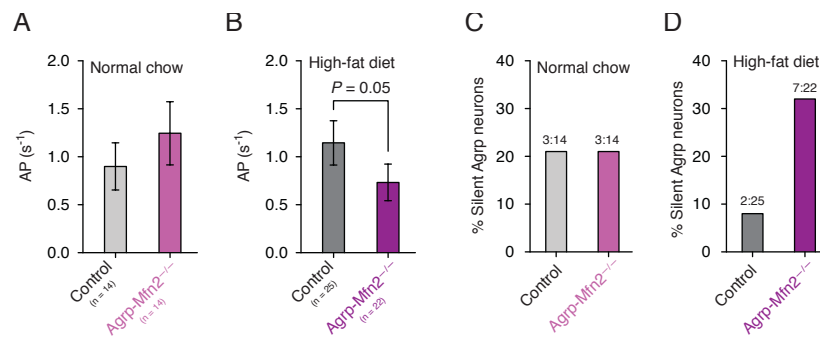

Supplemental Figure 5

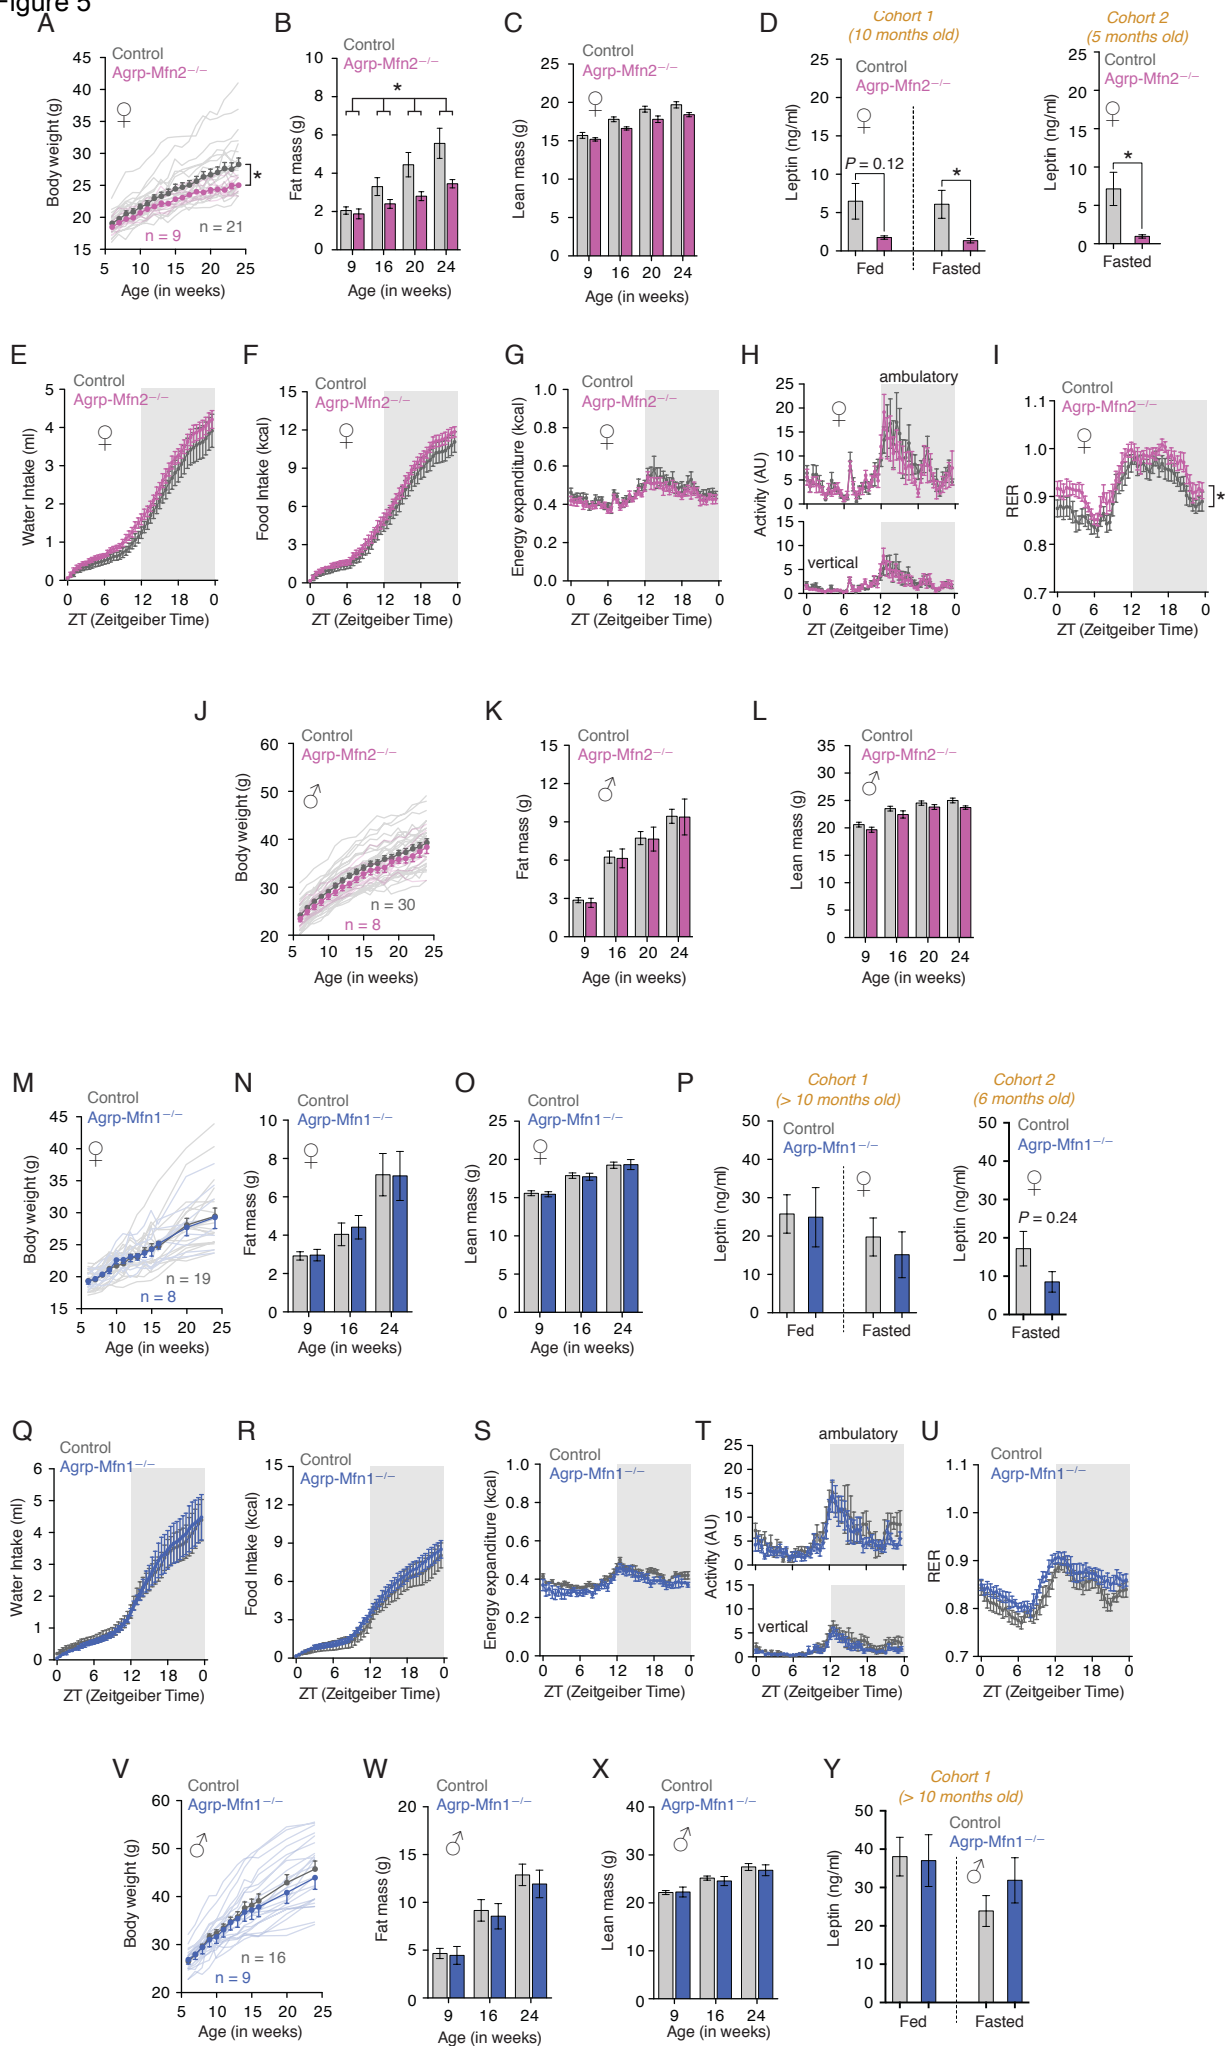

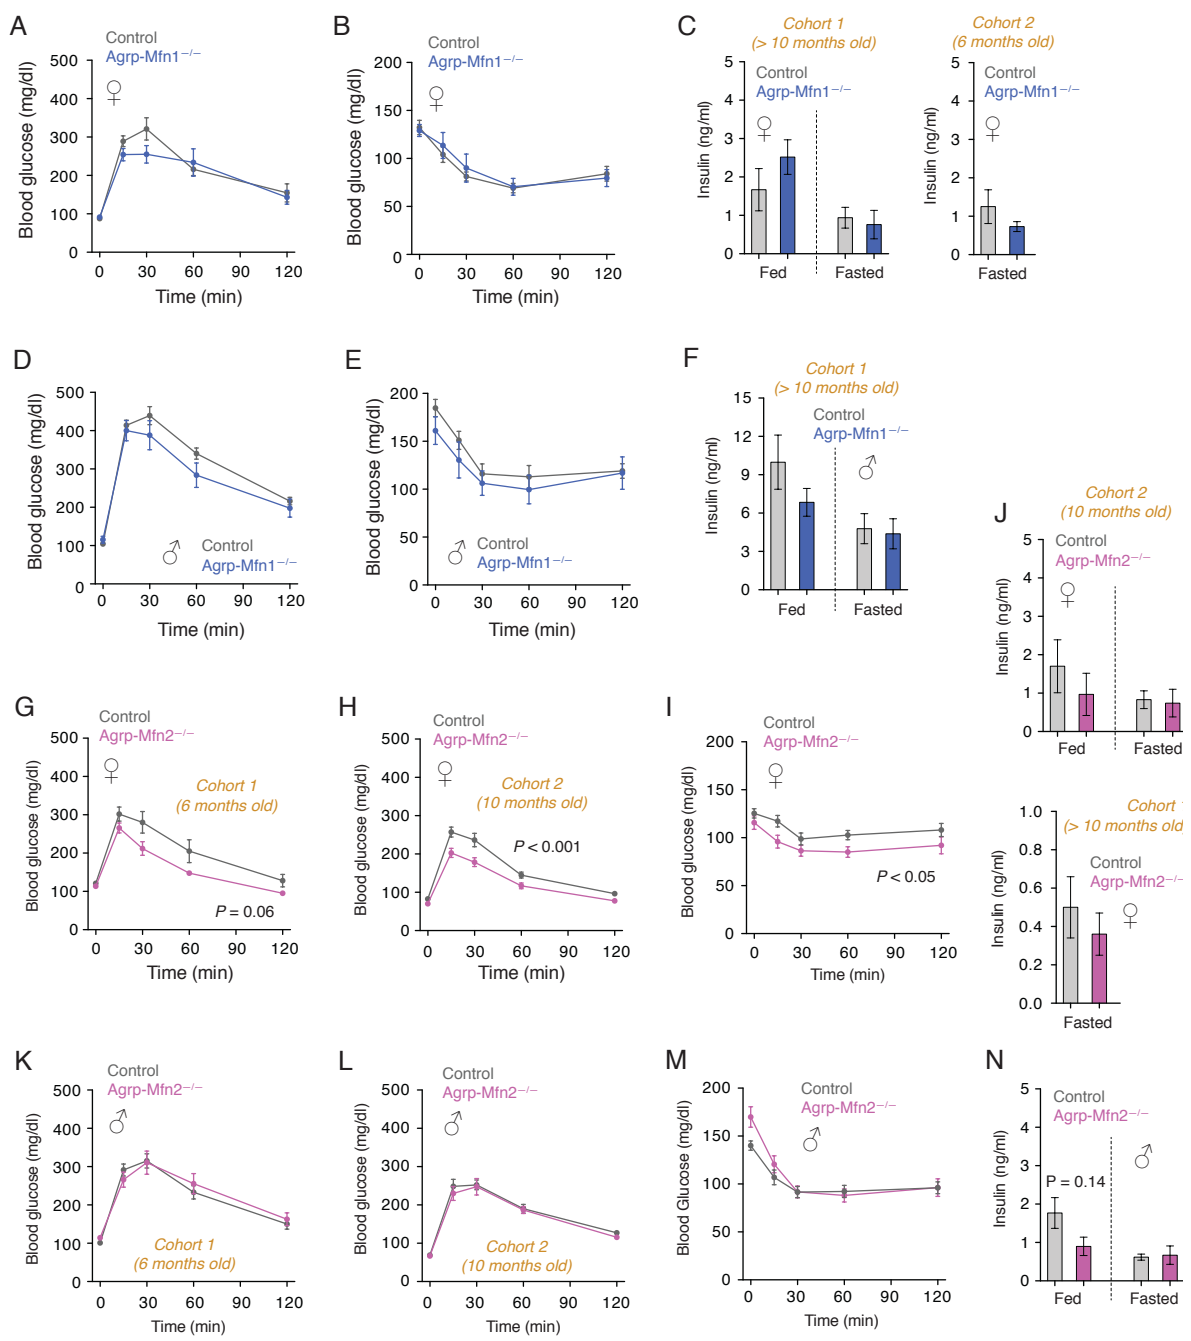

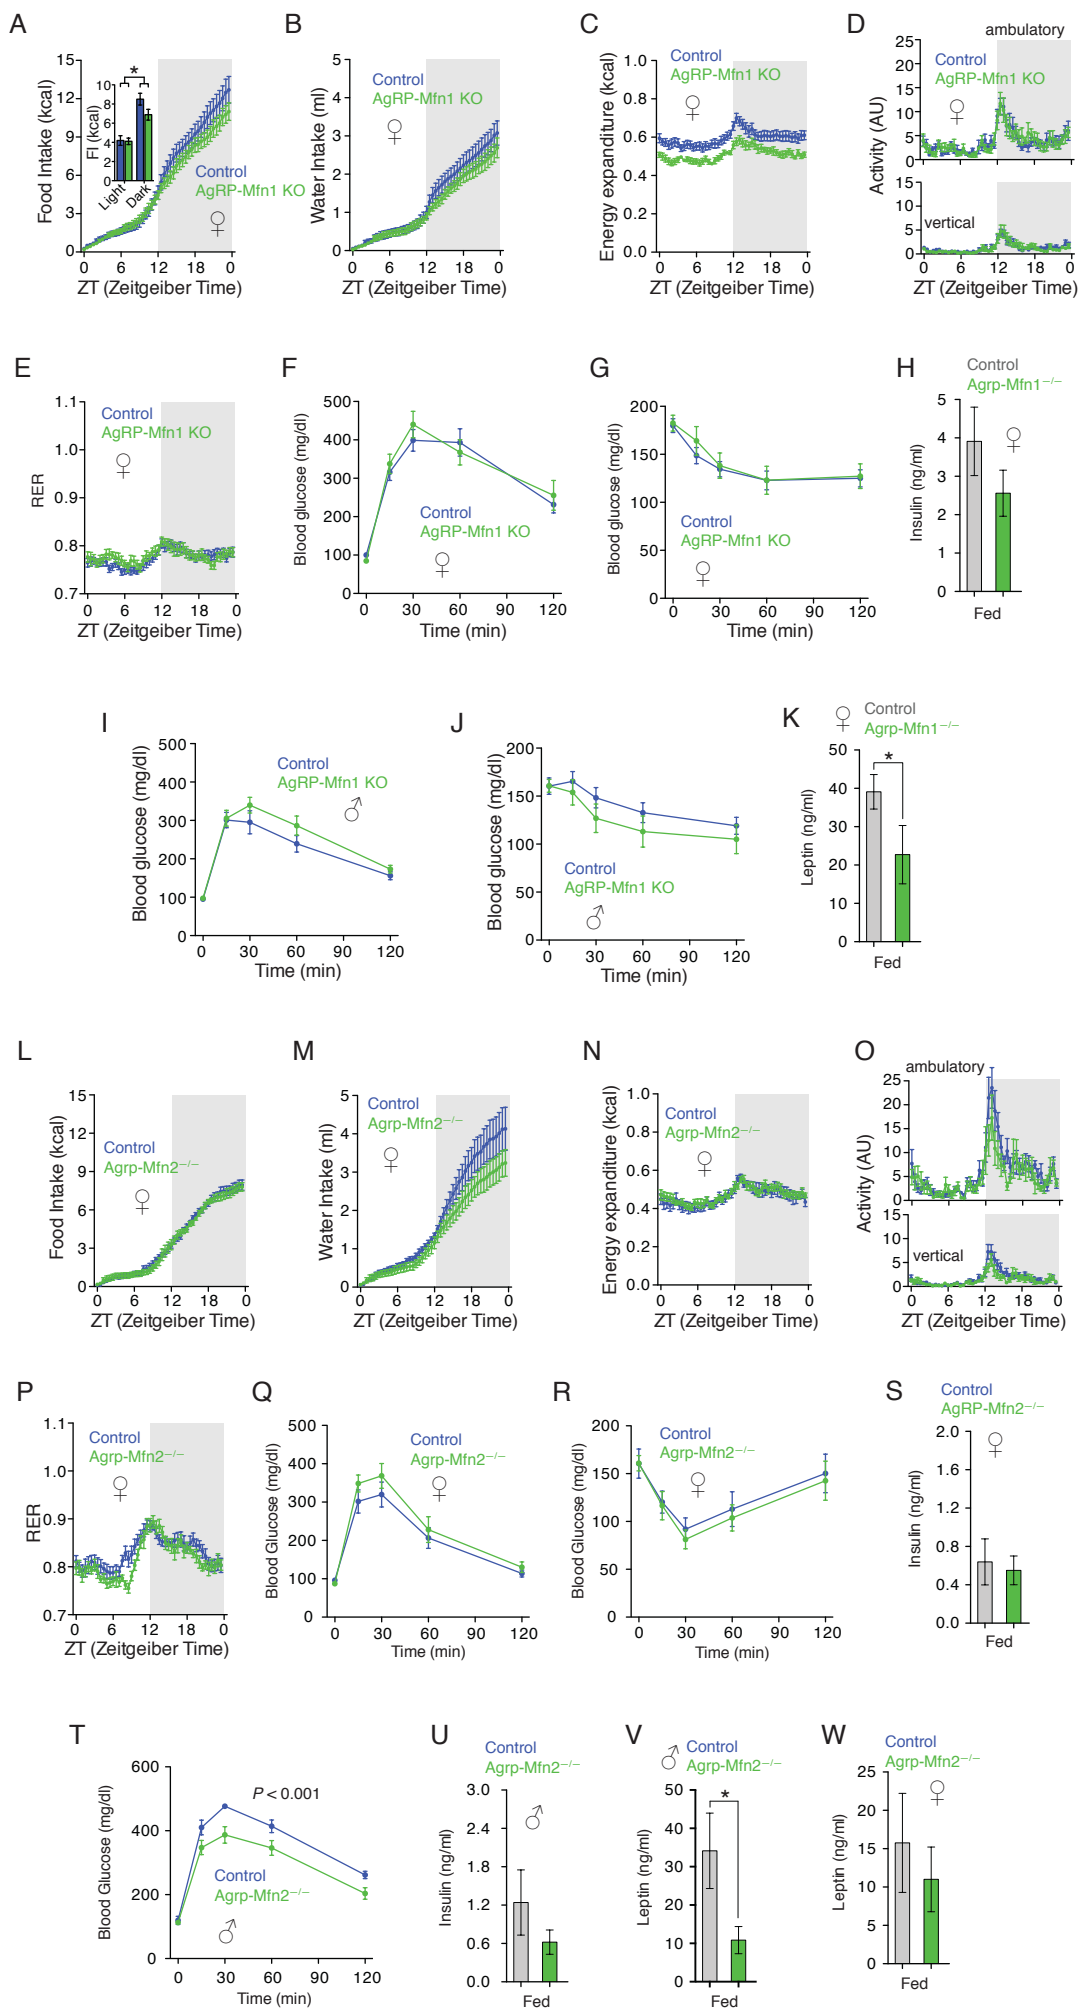

Supplement: NIHMS523961-supplement-02.pdf [file NIHMS523961-supplement-02.pdf]
